# Supplementary material
Source: publisher site journal article supplement (https://www.dovepress.com/article/408416)
Supplement: Supplementary file 1 [file get_supplementary_file.php]

**Supporting Information**

**Formulation and evaluation on synergetic anti-hepatoma effect of a chemically stable and release-controlled nanoself-assembly with natural monomers**

**Lanlan Zong1,&, Yanling Wang1,&, Shiyu Song1, Huiqi Zhang1, Shengcai Mu1, Wenshang Liu1, Yu Feng1, Shumin Wang1, Ziwei Tu1,** **Qi Yuan1,*****,Luhui Li2, Xiaohui Pu1,***

*1School of Pharmacy and Henan Province Engineering Research Center of High Value Utilization to Natural Medical Resource in Yellow River Basin, Henan University, Kaifeng, Henan, 475004, People’s Republic of China*

*2Medical school, Henan Technical Institute, Kaifeng, Henan, 475004, People’s Republic of China*

*& These authors contributed equally to this work and should be considered co-first authors*

*∗ Correspondence:*

*Qi Yuan, kaifengYQ2017@163.com;*

*Xiaohui Pu, Tel/Fax +86-371-23880680, pgh425@163.com*

### Model fitting – Eq S1 – S9

Multivariate linear, quadratic and cubic polynomial fitting was performed on R1, R2, R3, and the fitting results were as follows:

Multiple linear equations:

R1=185.42+1.60 A+0.28 B-2.00 C (r2=0.0609，*P*=0.0154<0.05) (Eq. S1)

R2=5.58-0.10 A+1.02 B-0.42 C (r2=0.4791，*P*=0.0324<0.05) (Eq. S2)

R3=4.02+0.74 A-0.59 B+0.36 C (r2=0.4618，*P*=0.0395<0.05) (Eq. S3)

Quadratic polynomial equation：

R1=182.06+1.60 A+0.27 B-2.00 C-0.57 AB-2.98 AC+2.03 B C+8.8 A2-1.07 B2-0.67 C2 (r2=0.5052，*P*=0.0090<0.05) (Eq. S4)

R2=5.84-0.10 A+1.02 B-0.42 C+0.76 AB+0.7 AC+0.037 BC+0.42 A2-0.76 B2-0.23 C2 (r2=0.8497，*P*=0.0319<0.05) (Eq. S5)

R3=3.47+0.74 A-0.59 B+0.3 C-0.39 AB+0.45 AC-0.84 BC+0.20 A2+0.33 B2+0.62 C2 (r2=0.8358，*P*=0.0396<0.05) (Eq. S6)

Cubic polynomial equation:

R1=182.06-3.18 A+2.03 B+2.92 C-0.57 AB-2.98 AC+2.03 BC+8.8 A2-1.07 B2-0.67 C2-3.50 A2B-9.85 A2C+9.55 AB2 (r2=0.9653，*P*=0.0224<0.05) (Eq. S7)

R2=5.84+0.38 A+1.15 B-0.36 C+0.76 AB+0.71 AC+0.037 BC+0.42 A2-0.76 B2-0.2 C2-0.25 A2B-0.12 A2C-0.97 AB2 (r2=0.9486，*P*=0.0466<0.05) (Eq. S8)

R3=3.47+1.11 A-0.77 B+0.012 C-0.39 AB+0.45 AC-0.84 BC+0.20 A2+0.33 B2+0.62 C2+0.36 A2B+0.70 A2C-0.74 AB2 (r2=0.9705，*P*=0.0166<0.0001) (Eq. S9)


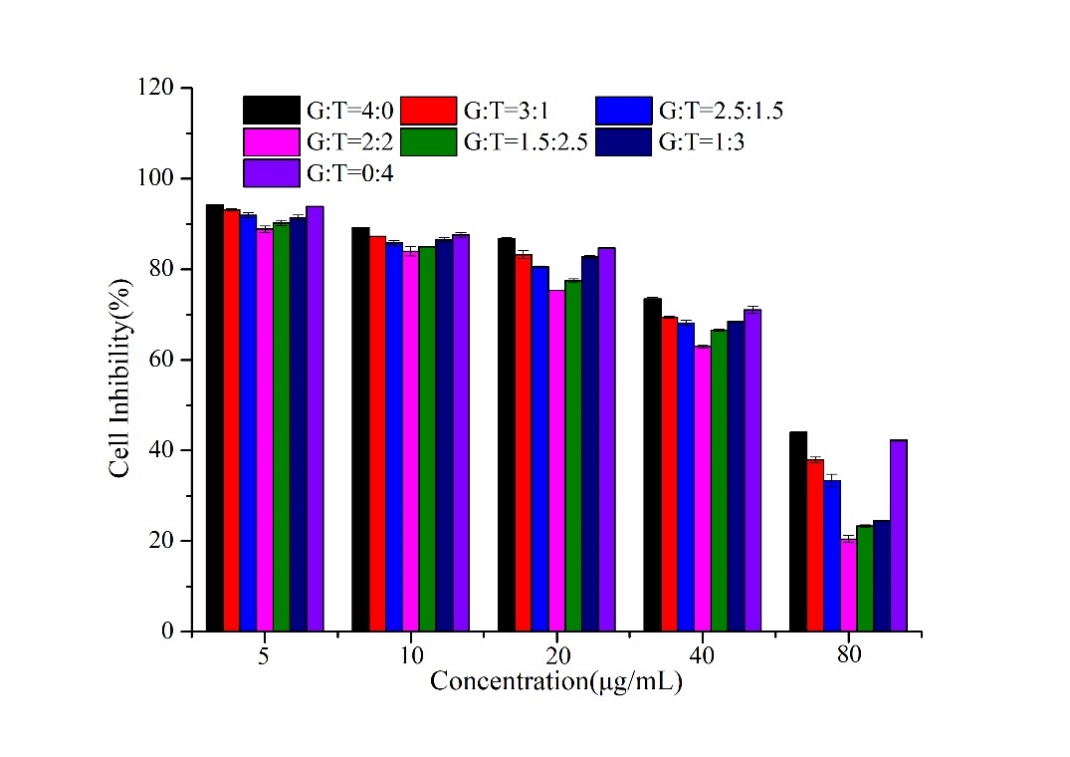


Fig. S1 Cytotoxicity of free drugs with different mass ratios on HepG2 cell after 24 h.

Fig. S2 Three-dimensional effect surface map of star design.

Fig. S3 Schematic diagram of docking between TAN and DCA (A), GA and DCA (B), and GA and TAN (C).

Fig. S4 The results of protein adsorption test. **P*<0.05, ***P*<0.01.

Fig. S5 The results of hemolysis test. A: The appearance of hemolytic samples (a. Original samples; b. 50 μg/mL; c. 100 μg/mL; d. 250 μg/mL; e. 500 μg/mL); B: The results of hemolysis rate.

Fig. S6 The results of cell uptake assay. **P*<0.05, ***P*<0.01.





Fig. S7 The inhibition ratio of tumor weight in each treatment groups. *P<0.05, **P<0.01.

Table S1 The factors and levels of star design

| Factors | Level | | |
| --- | --- | --- | --- |
| -1 | 0 | 1 |
| Drug:Carrier | 1:15 | 1:10 | 1:5 |
| GA:TAN | 1:2 | 1:1 | 2:1 |
| Organic solvent:Water | 1:15 | 1:10 | 2:15 |

Table S2 Experimental results of star design

| Number | Factors | | | Experimental Results | | |
| --- | --- | --- | --- | --- | --- | --- |
| A | B | C | Y1/Size (nm) | Y2/GA-LC% | Y3/TAN-LC% |
| 1 | 0 | 0 | 0 | 181.1 | 5.44 | 3.41 |
| 2 | 0 | 1 | -1 | 177.4 | 6.33 | 4.48 |
| 3 | -1 | 1 | 0 | 182.6 | 6.23 | 3.62 |
| 4 | 0 | 0 | 0 | 185.5 | 5.25 | 3.32 |
| 5 | 1 | 0 | -1 | 197.0 | 6.19 | 4.25 |
| 6 | -1 | 0 | 1 | 189.5 | 4.47 | 3.45 |
| 7 | 1 | 0 | 1 | 177.2 | 6.65 | 6.56 |
| 8 | 0 | -1 | 1 | 179.2 | 3.31 | 6.05 |
| 9 | 1 | -1 | 0 | 198.3 | 3.25 | 5.17 |
| 10 | -1 | -1 | 0 | 184.4 | 5.96 | 3.66 |
| 11 | 0 | -1 | -1 | 177.4 | 4.11 | 4.34 |
| 12 | 0 | 0 | 0 | 180.5 | 6.11 | 3.26 |
| 13 | 0 | 0 | 0 | 184.3 | 5.89 | 3.26 |
| 14 | 1 | 1 | 0 | 194.2 | 6.58 | 3.48 |
| 15 | -1 | 0 | -1 | 197.4 | 6.84 | 2.92 |
| 16 | 0 | 1 | 1 | 187.3 | 5.68 | 2.82 |
| 17 | 0 | 0 | 0 | 178.9 | 6.53 | 4.12 |

Table S3 The characteristics of three batches of PD@TG-Nanos for process verification (n=3)

| Groups | Size(nm) | DLC% of GA | DLC% of TAN | EE% of GA | EE% of TAN |
| --- | --- | --- | --- | --- | --- |
| 1 | 175.2 | 6.51 | 6.43 | 80.83 | 78.59 |
| 2 | 176.4 | 6.41 | 6.49 | 79.75 | 78.74 |
| 3 | 180.7 | 6.48 | 6.53 | 80.21 | 79.42 |
